# Supplementary material
Source: PubMed Central journal article supplement (PMC3677246)
Supplement: supp_036657.112_SuppFigsS1-S3.pdf [file supp_036657.112_SuppFigsS1-S3.pdf]

# The plasticity of a structural motif in RNA: structural polymorphism of a kink turn as a function of its environment

Peter Daldrop and David M.J. Lilley

## SUPPLEMENTARY INFORMATION

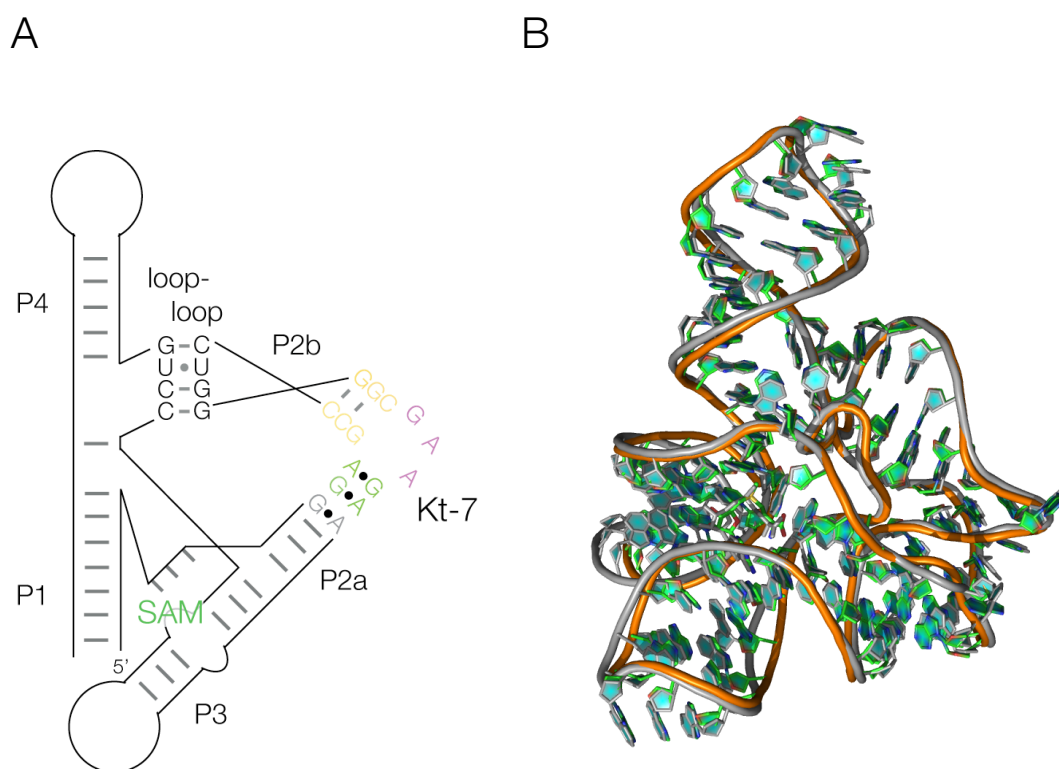

**Figure S1.** The crystal structure of the SAM-I riboswitch containing Kt-7.

**A.** Schematic showing the secondary structure of the SAM-I riboswitch. The position and sequence of the Kt-7 is shown, and the SAM ligand is shown in green.

**B.** Overlay of the SAM-I riboswitch containing Kt-7 (colored) superimposed with that of the unmodified riboswitch (grey).

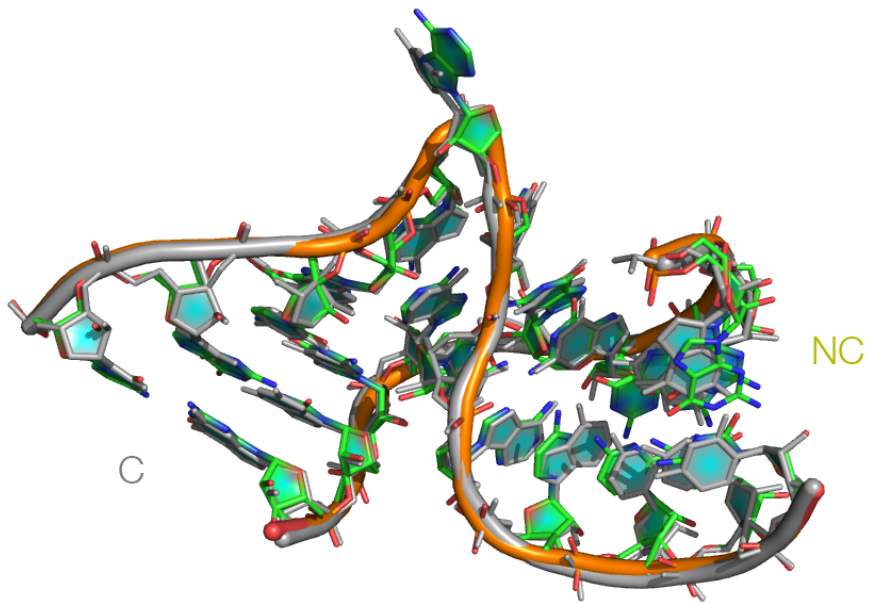

**Figure S2.** An overlay of the k-turn region of the SAM-I riboswitch carrying the *H. marismortui* Kt-7 sequence (colored) and that of the unmodified riboswitch (grey) PDB code 3GX5.

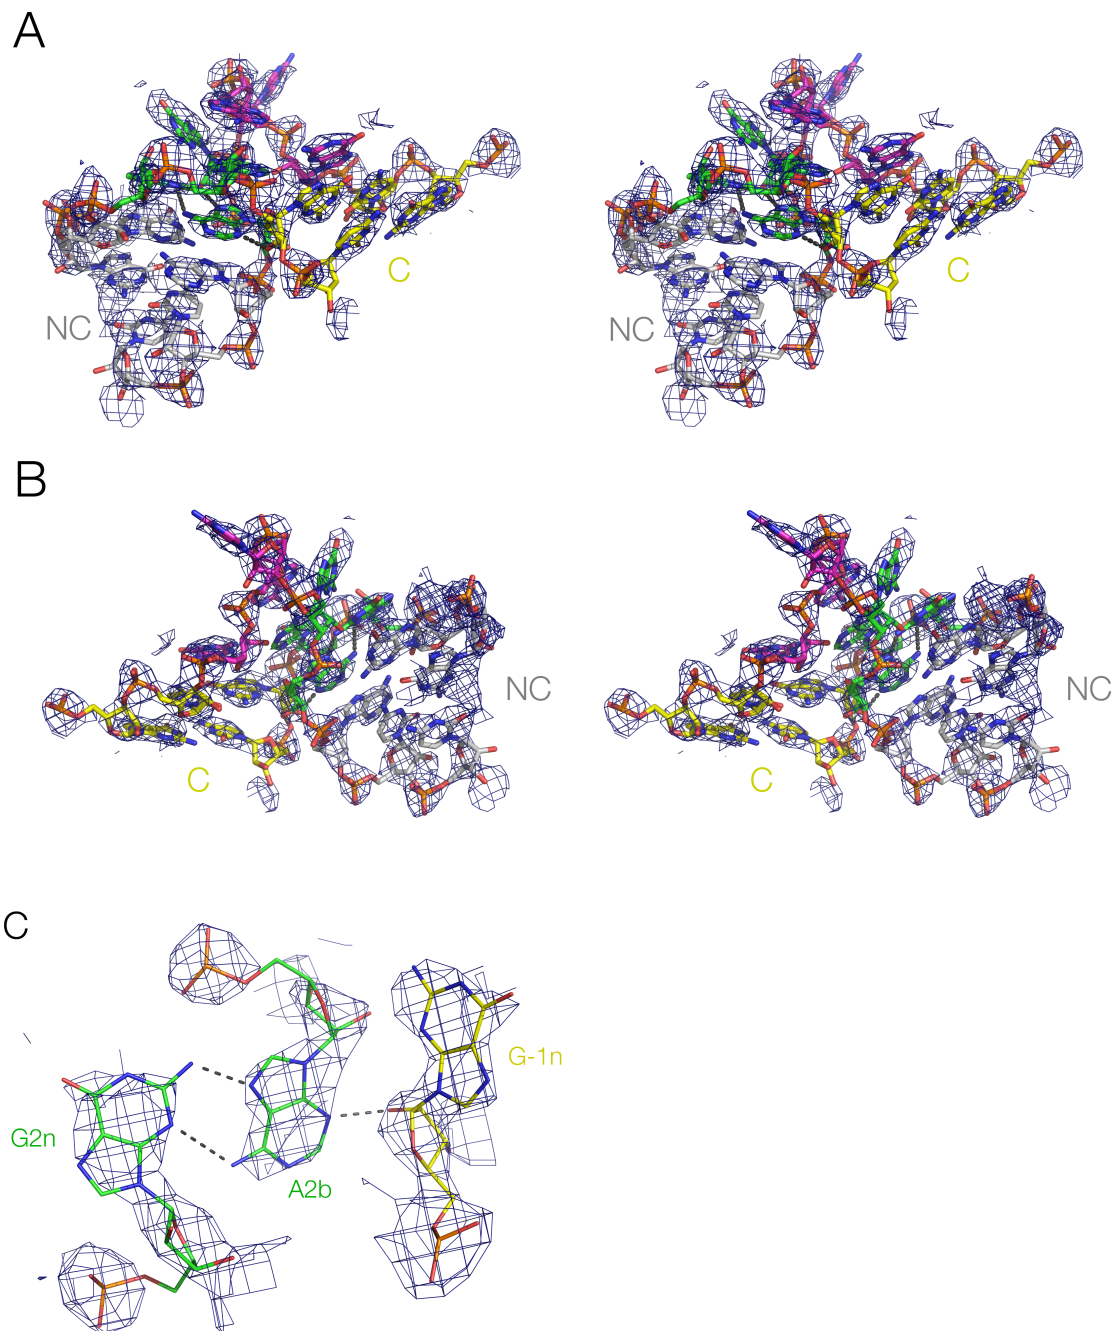

**Figure S3.** The k-turn region of the SAM-I riboswitch carrying the *H. marismortui* Kt-7 sequence. Nucleotides are colored as in the schematic representation in Figure 1. The composite omit map contoured at  $1.2 \sigma$  is shown as the blue mesh.

**A, B.** Parallel-eye stereoscopic views of the k-turn seen from the non-bulged strand and the bulged strand sides respectively.

**C.** A detail focussing on the G2n•A2b pair and the interaction with the O2' of G-1n.
